# Supplementary material
Source: publisher site journal article supplement (https://www.dovepress.com/get_supplementary_file.php?f=303721.docx)
Supplement: Supplementary file 1 [file get_supplementary_file.php]

**Supplementary table 1** Demographic details, clinical features, management and outcome of all 26 eyes with *Pythium* keratitis

| Case (Sex/Age/Occupation) | Co-morbidity | History of ocular injury | History of water contamination | History of eye contaminated with natural substances | Duration from onset of symptoms to our hospital (days) | BCVA | Pattern | Depth  (up to) | Size (mm x mm) | Treatment received | | | | | Outcome  BCVA |
| --- | --- | --- | --- | --- | --- | --- | --- | --- | --- | --- | --- | --- | --- | --- | --- |
| Systemic | Topical | Injection | Operationa | Pythium vaccine |  |
| 1 (M/50/Agriculturist) | DLP |  | ü |  | 30 | HM | Reticular | Anterior stroma | 3 x 6.4 | N/A | NA, AMB, AZM, LZD, VRC | IS VRC | TPK x2 | N/A | Enucleation |
| 2 (M/46/ Agriculturist) | none | ü |  |  | 3 | HM good PJ | Reticular | Posterior stroma | 4.5 x 5.5 | ITC, TRB | NA, AMB, LZD, AZM, VRC | IC AMB IS AMB | PACK-CXL x1  TPK x2 | N/A | HM good PJ |
| 3* (M/33/ Agriculturist) | none | ü | ü | ü | 14 | FC 1 ft | Reticular | Anterior stroma | 7.3 x 8.7 | ITC | NA, FLC, MXF | IC AMB IS AMB | Bx x1  TPK x1 | D0b  D14  D28  D92  D183 | Enucleation |
| 4 (M/29/Salary man) | none |  |  | ü | 14 | FC 1 ft | Reticular | Anterior stroma | 1.0 x 1.2 | ITC, TRB | NA, FLC, CFZ, VRC, LVX | IS VRC | TPK x1 | D0  D7 | 10/200 |
| 5 (M/26/Salary man) | none |  | ü |  | 20 | HM good PJ | Satellite | Posterior stroma | 5.5 x 5.8 | ITC, TRB | FLC, AMB, TRB, VRC, MXF | N/A | TPK x1 | D0  D7  D15  D29  D141  D153  D202  D230 | FC 2 ft |
| 6 (M/26/Salary man) | none |  | ü |  | 20 | 20/40 | Reticular | Mid stroma | 4 x 4 | ITC, TRB | FLC, AMB, TRB, VRC, MXF | N/A | Bx x1 | D0  D7  D15  D29  D141  D153  D202  D230 | FC 5 ft |
| 7* (M/47/ Agriculturist) | none | ü | ü | ü | 14 | HM good PJ | Satellite | N/A | 6.0 x 8.2 | ITC, TRB, PSZ | NA, VRC, MXF | IC AMB | Bx x1 | D0 | Evisceration |
| 8* (F/33/Government officer) | none |  |  |  | 45 | HM good PJ | Reticular | Anterior stroma | 6.9 x 7.2 | ITC, TRB | VRC, NA, MXF, BES | N/A | Bx x1 TPK x1 | D0  D14  D28  D47  D89  D173  D198  D533 | 20/40 |
| 9 (M/62/Agriculturist) | none | ü | ü | ü | 18 | HM good PJ | Satellite | Posterior stroma | 2.2 x 4.2 | ITC | NA, VRC | IC AMB  IS VRC | TPK x1 | N/A | Evisceration |
| 10 (F/61/Agriculturist) | none |  |  |  | 45 | HM good PJ | Dense, total | Posterior stroma | 4.0 x 6.0 | ITC, TRB | FLC, NA | IC AMB | N/A | D0 | Evisceration |
| 11 (M/43/Agriculturist) | none |  |  |  | 14 | FC 2 ft | N/A | Midstroma | 4.5 x 6.0 | ITC, TRB,  LZD, AZM | NA, AMB, CFZ, LZD, AZM, AMK, MXF | IC AMB, IS AMB | TPK x2 | D0  D15  D26  D63  D105  D189  D210  D575 | Evisceration |
| 12 (M/54/Agriculturist) | HT, DLP | ü | ü | ü | 14 | HM | Reticular | N/A | 4.1 x 6.0 | ITC, VRC,  AZM | NA, AMB, VRC, MXF, AZM, LVX | IC AMB, IS AMB | TPK x1 | N/A | Evisceration |
| 13 (F/34/Salary man) | Hb E trait |  | ü |  | 7 | FC 3 ft | Reticular | Anterior stroma | N/A x 1.8 | KCZ, ITC, Dox | FLC, AMB, NA, VRC, MXF, GFX, PHMB | N/A | Bx x1  TPK x1 | D0  D14  D28  D42 | 5/200 |
| 14 (M/51/Agriculturist) | none |  | ü |  | 34 | HM good PJ | Satellite | Posterior stroma | 5.0 x 8.0 | ITC, TRB | VRC, NA, AMB | IC AMB | PACK-CXL x1  TPK x2 | D0  D13  D29  D36  D85  D187  D365  D728 | Evisceration |
| 15 (F/55/Agriculturist) | none | ü |  | ü | 14 | HM good PJ | Satellite | Posterior stroma | 3.6 x 4.2 | VRC, TRB | VRC, NA, CFZ, CAZ, MXF | IC AMB,  IS AMB | Bx x1  TPK x2 | D0 | Evisceration |
| 16 (F/43/Housewife) | none |  |  |  | 21 | FC 1/2 ft | Reticular | Anterior stroma | 5.4 x 5.6 | ITC, TRB | FLC, NA, MXF | N/A | TPK x2 | D0  D14 | HM good PJ |
| 17 (F/61/Housewife) | DM |  |  | ü | 30 | HM good PJ | Satellite | Posterior stroma | N/A | ITC, TRB | FLC, TRB, AMB, MXF | N/A | Bx x1  TPK x1 | N/A | FC 1/2 ft |
| 18 (F/73/Agriculturist) | DLP | ü | ü | ü | 7 | HM good PJ | Satellite | Posterior stroma | 4.8 x 6.2 | ITC, TRB | FLC, NA | IC AMB | Bx x1  TPK x2 | D0  D9  D23  D37  D79  D174  D356  D727 | Evisceration |
| 19 (F/56/Housewife) | none |  |  |  | 1 | FC2ft | Multifocal | Anterior stroma | 2.2 x 3.2 | ITC | NA, AMB, MXF, CAZ, CFZ | IC AMB, IS AMB  IS VRC  IVT VAN+ CAZ | TPK x1 | D0  D20  D33  D47  D97  D180  D378  D743  D1108 | HM |
| 20 (M/42/Agriculturist) | none |  | ü | ü | 10 | HM good PJ | N/A | Posterior stroma | 4.4 x 5.2 | ITC, TRB  VRC | NA, AMB, VRC, MXF, AZM | IC AMB, IS AMB | N/A | N/A | Evisceration |
| 21 (F/21/Student) | none |  |  |  | 2 | FC 3 ft | Reticular | Anterior stroma | 2.8 x 6.5 | ITC, TRB  CIP | FLC, AMB, VRC, NA, CFZ, AMK, LVX | IC AMB | Bx x1  TPK x1 | D0  D7  D14  D64  D72  D78  D97  D103  D110 | 5/200 |
| 22 (F/61/Self-employed) | HT |  |  | ü | 7 | HM good PJ | Satellite | Posterior stroma | 6.0 x 6.5 | ITC | FLC, AMB, MXF | IC AMB | TPK x1 | D0  D14  D29  D43 | Evisceration |
| 23 (M/62/Agriculturist) | none | ü | ü | ü | 7 | PL | Satellite | N/A | 7.0 x 9.0 | ITC, TRB | FLC, NA, MXF | IC AMB | TPK x1 | D0  D7  D13 | Enucleation |
| 24 (F/58/Agriculturist) | none | ü |  | ü | 60 | HM good PJ | Multifocal | Posterior stroma | 4.5 x 6.0 | VRC | NA, AMB, VRC | IS AMB | TPK x1 | N/A | Enucleation |
| 25 (M/28/Agriculturist) | none |  |  |  | 30 | 20/50 | Reticular | Anterior stroma | 2.8 x 3.0 | N/A | NA, AMB | N/A | N/A | N/A | 20/25 |
| 26 (M/44/Government officer) | none | ü |  | ü | 10 | HM good PJ | Satellite | Posterior stroma | 6.5 x 8.0 | ITC | FLC, VRC, NA, VAN, AMK, CFZ | IC AMB,  ILES AMB | N/A | N/A | Evisceration |

M, Male; F, Female

DLP, Dyslipidemia; HT, Hypertension; Hb E, Hemoglobin E; DM, Diabetes mellitus

BCVA, Best Corrected Visual Acuity; HM, Hand movement, PJ, Projection of light; PL, Light perception

AMB, Amphotericin B; AMK, Amikacin; AZM, Azithromycin; BES, Besifloxacin; CAZ, Ceftazidime; CFZ, Cefazolin; CIP, Ciprofloxacin; Dox,Doxycycline; FLC, Fluconazole

GFX, Gatifloxacin; ITC, Itraconazole; KCZ, Ketoconazole; LVX, Levofoxacin; LZD, Linezolid; MXF, Moxifloxacin; NA, Natamycin; PHMB, Polyhexamethylene biguanide; PSZ, Posaconazole; TRB, Terbinafine
VAN, Vancomycin; VRC, Voriconazole

IC, Intracameral; ILES, Intralesional; IS, Intrastromal

Bx, Biopsy; PACK-CXL, Photoactivated Chromophore for Keratitis-Corneal Collagen Cross-linking; TPK, Therapeutic Penetrating Keratoplasty

N/A, Not available

* Eyes which intersected with included cases of reference no. 8

aOperation x times

bD0, Date of first PIAI injection
